# Supplementary material for: Toward eco-friendly protocols: insights into direct arylation polymerizations under aerobic conditions in anisole
Source: Royal Society of Chemistry journal article supplement (doi:10.1039/d2py01214f), 2022-12-09
Supplement: d2py01214f1.pdf [file d2py01214f1.pdf]

Electronic Supplementary Information

# **Toward eco-friendly protocols: insights into direct arylation polymerizations under aerobic conditions in anisole**

Claudia Carlucci,<sup>a</sup> Daniele Conelli,<sup>b</sup> Omar Hassan Omar,<sup>c</sup> Nicola Margiotta,<sup>d</sup> Roberto Grisorio\*<sup>a,b</sup>  
and Gian Paolo Suranna<sup>a,b</sup>

<sup>a</sup>CNR NANOTEC – Istituto di Nanotecnologia, Via Monteroni, 73100 Lecce, Italy.

<sup>b</sup>Dipartimento di Ingegneria Civile, Ambientale, del Territorio, Edile e di Chimica (DICATECh),  
Politecnico di Bari, Via Orabona 4, 70125 Bari, Italy. E-mail: roberto.grisorio@poliba.it

<sup>c</sup>CNR ICCOM – Istituto di Chimica dei Composti Organometallici, Via Edoardo Orabona 4, 70126  
Bari, Italy.

<sup>d</sup>Dipartimento di Chimica, Università degli Studi di Bari Aldo Moro, Via Orabona 4, 70126 Bari,  
Italy.

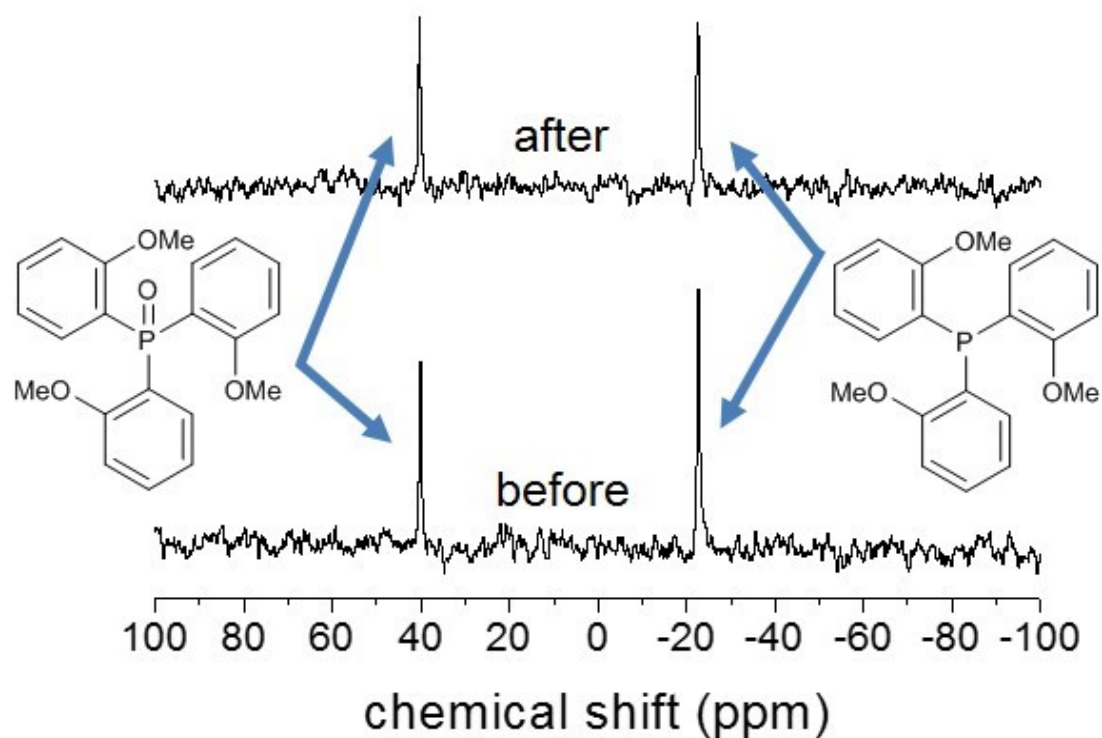

**Fig. S1.**  $^{31}\text{P}$  NMR spectra (recorded in  $\text{CDCl}_3$ ) of  $\text{P}(o\text{-Anisyl})_3$  dispersed in anisole before and after a thermal treatment at  $110\text{ }^\circ\text{C}$  for 24 h in air. The comparison clearly evidences the formation of a new species (the phosphine-oxide) immediately after the phosphine dissolution in anisole under aerobic conditions. The protection exerted by the anisole vapours against the oxygen dissolution in the solvent during the thermal treatment avoids the complete oxidation of the pristine ligand, as described in the manuscript.

**Table S1.** Molecular weights and yield of **P1** synthesized by using different palladium precatalysts.

| Entry | Palladium source                 | Yield (%) <sup>a</sup> | M <sub>n</sub> (Da) <sup>b</sup> | M <sub>w</sub> (Da) <sup>b</sup> | Đ <sup>b</sup> |
|-------|----------------------------------|------------------------|----------------------------------|----------------------------------|----------------|
| 1     | Pd <sub>2</sub> dba <sub>3</sub> | 42                     | 4500                             | 6800                             | 1.5            |
| 2     | Pd(AcO) <sub>2</sub>             | 58                     | 5100                             | 7000                             | 1.4            |
| 3     | Pd(PivO) <sub>2</sub>            | 53                     | 5000                             | 7900                             | 1.6            |

<sup>a</sup>Measured after polymer precipitation in methanol, Soxhlet washing with methanol, acetone and hexane, Soxhlet extraction with chloroform, and reprecipitation in methanol. <sup>b</sup>Number-average molecular weights (M<sub>n</sub>), weight-average molecular weights (M<sub>w</sub>) and dispersity (Đ) as determined by GPC (PS standards, THF).

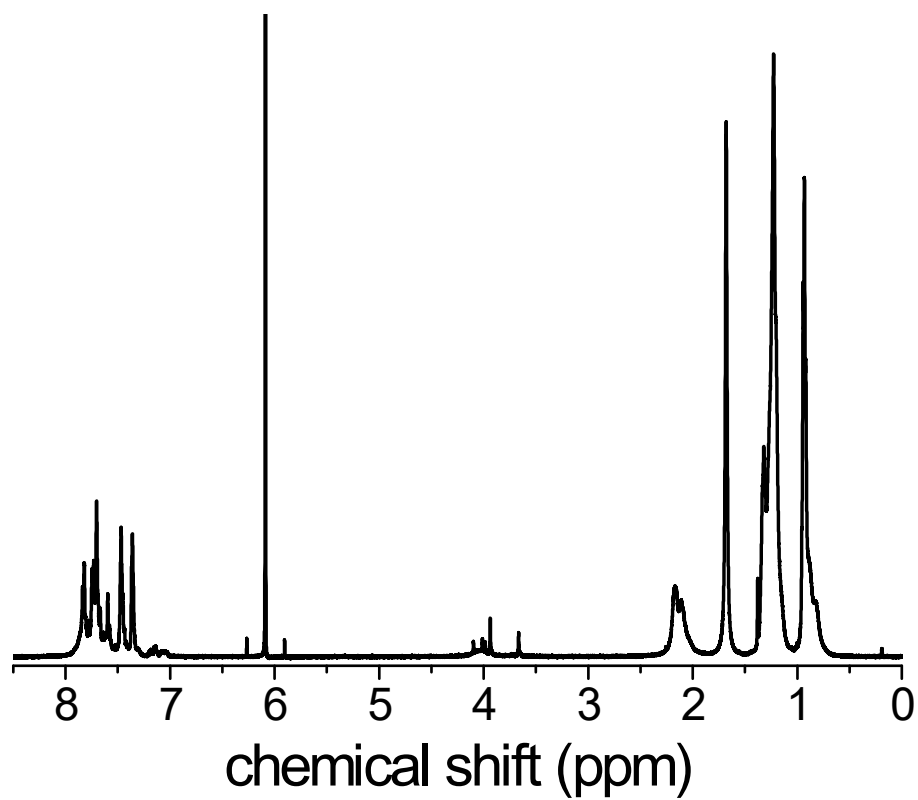

**Fig. S2.** <sup>1</sup>H NMR spectrum of **P1** (entry 5) recorded in C<sub>2</sub>D<sub>2</sub>Cl<sub>4</sub>.

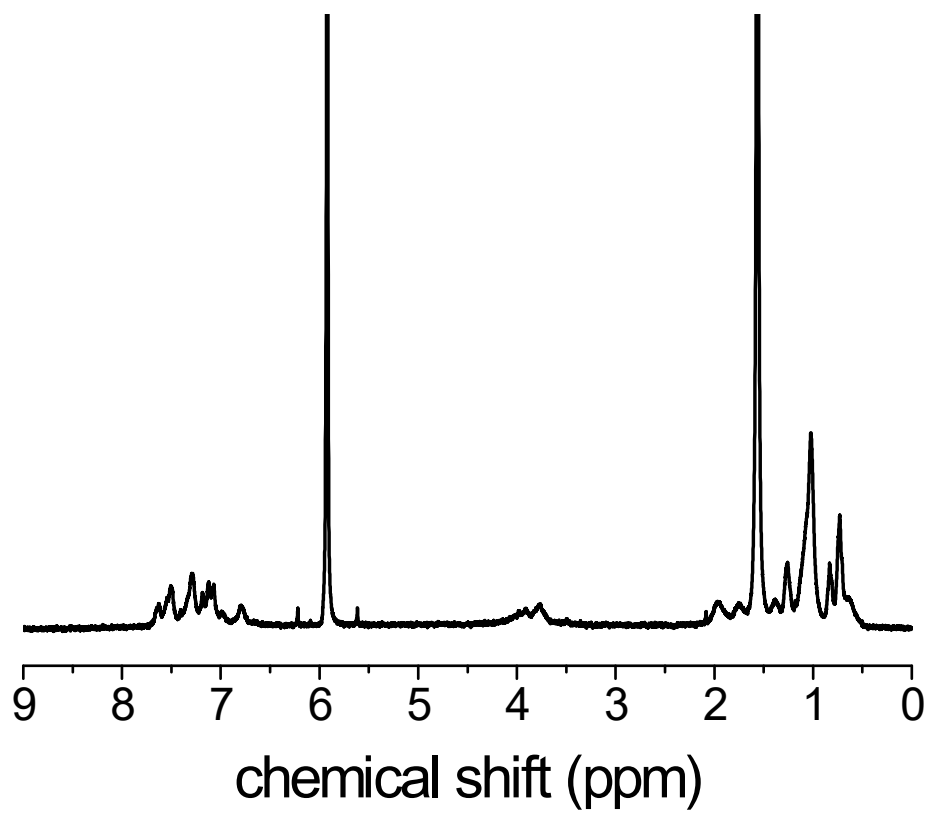

**Fig. S3.**  $^1\text{H}$  NMR spectrum of **P2** recorded in  $\text{C}_2\text{D}_2\text{Cl}_4$ .

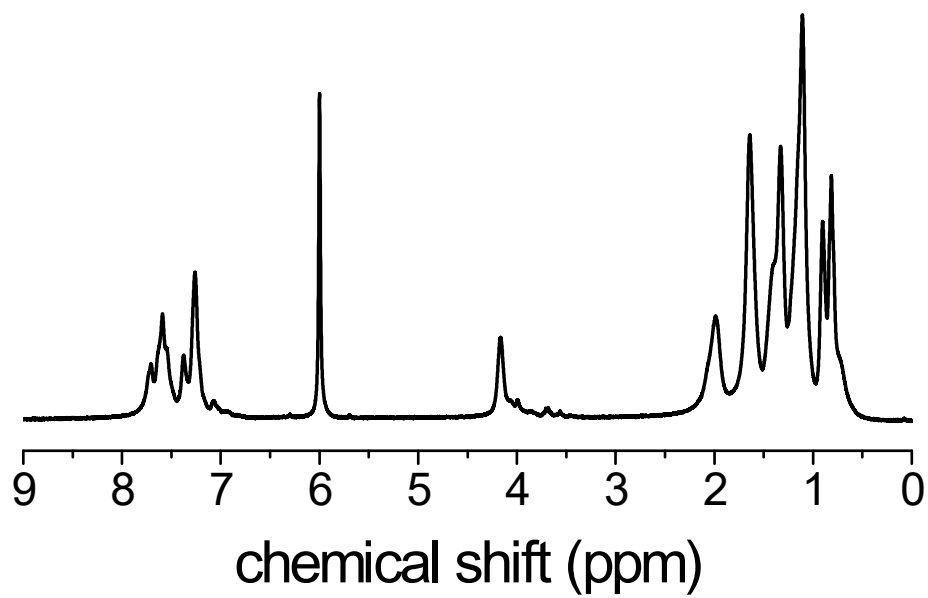

**Fig. S4.**  $^1\text{H}$  NMR spectrum of **P3** recorded in  $\text{C}_2\text{D}_2\text{Cl}_4$ .

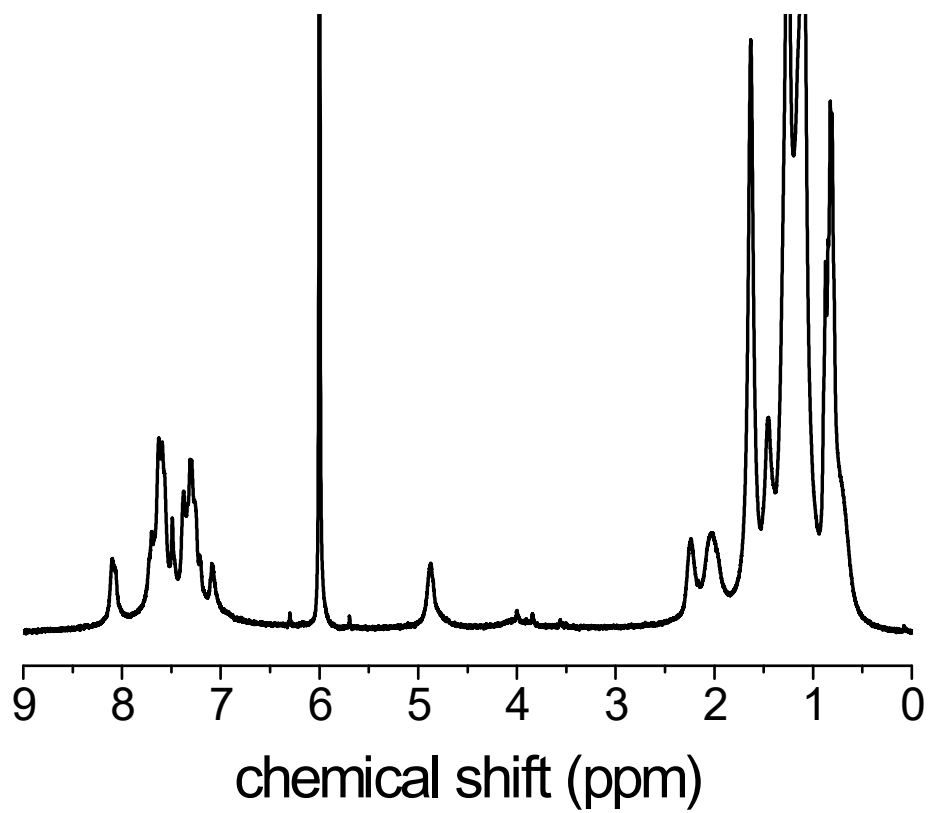

**Fig. S5.**  $^1\text{H}$  NMR spectrum of **P4** recorded in  $\text{C}_2\text{D}_2\text{Cl}_4$ .

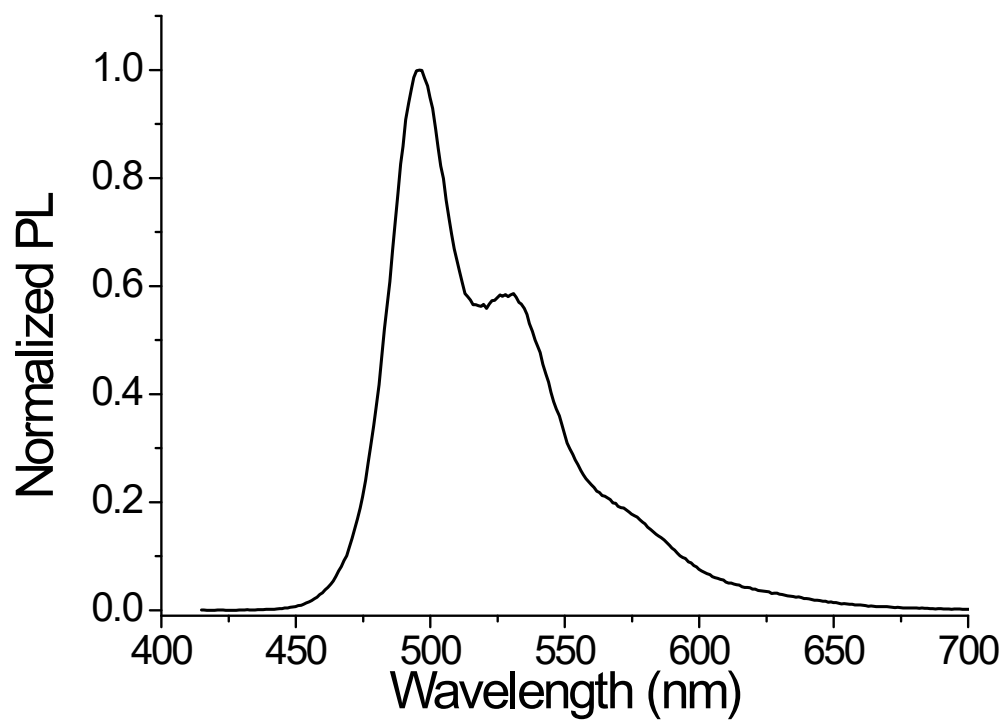

**Fig. S6.** PL spectrum of **P1** recorded in chloroform.



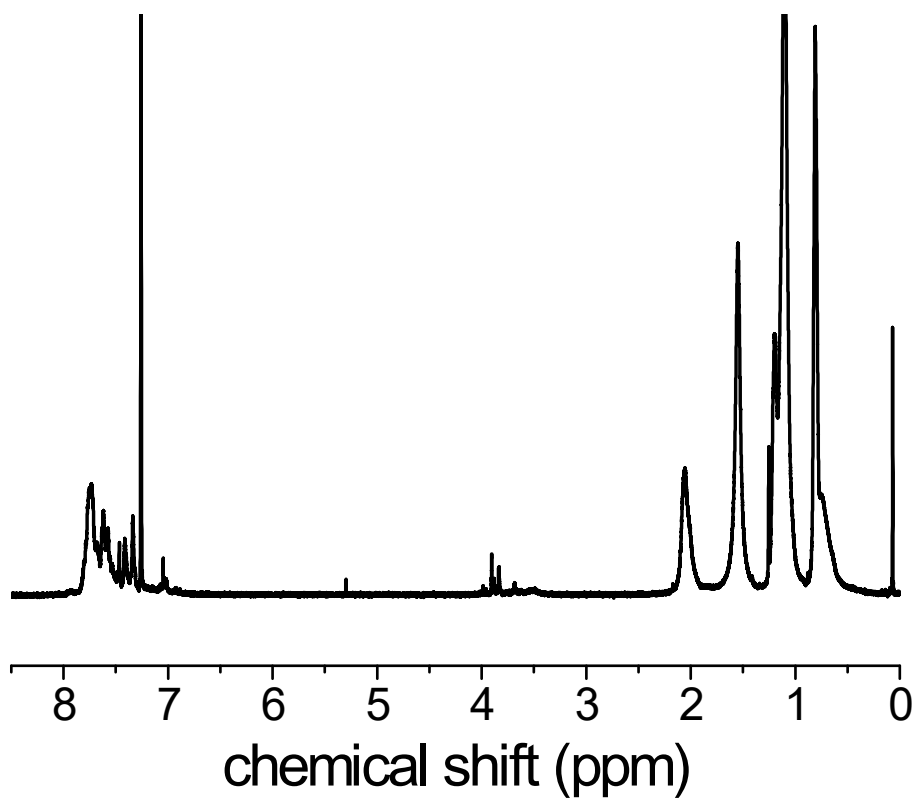

**Fig. S7.**  $^1\text{H}$  NMR spectrum of **P5** recorded in  $\text{CDCl}_3$ .

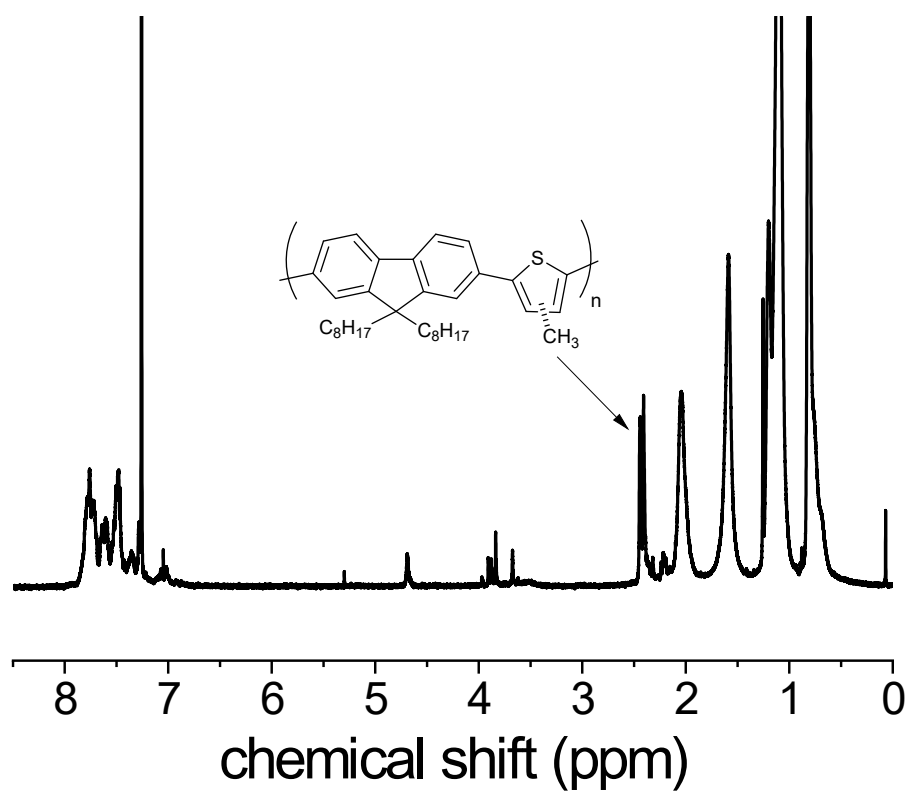

**Fig. S8.**  $^1\text{H}$  NMR spectrum of **P6** recorded in  $\text{CDCl}_3$ .

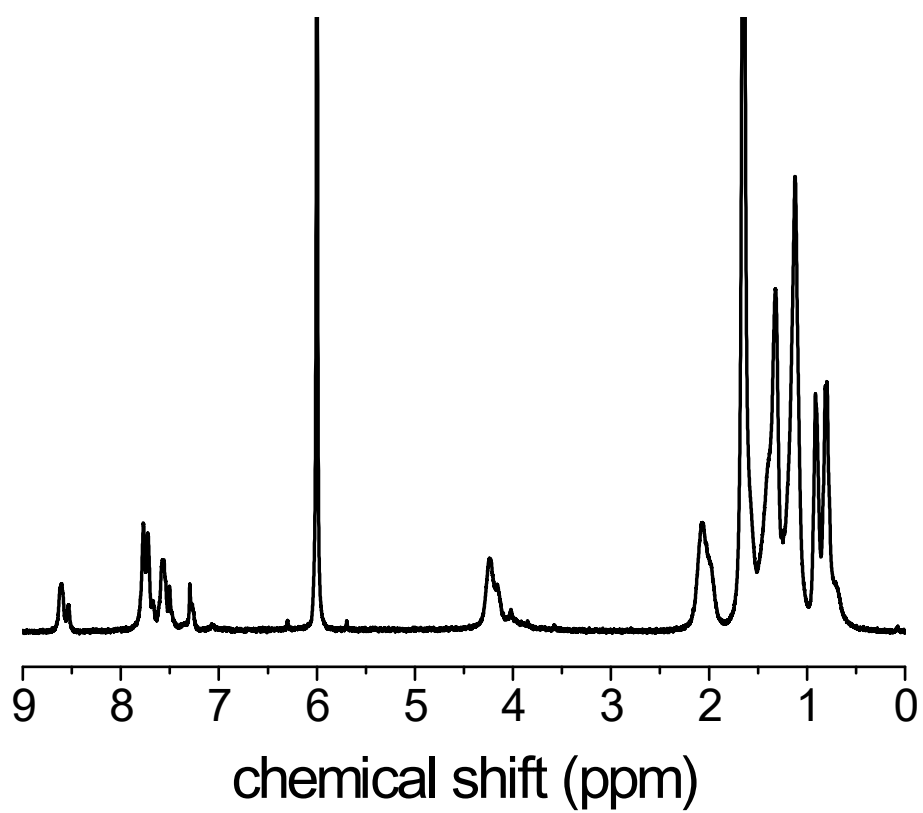

**Fig. S9.**  $^1\text{H}$  NMR spectrum of **P8** recorded in  $\text{C}_2\text{D}_2\text{Cl}_4$ .
